# Supplementary material for: Global analysis of mRNA stability in the archaeon Sulfolobus
Source: PubMed Central journal article supplement (PMC1794556; doi:10.1186/gb-2006-7-10-r99), 2006-10-26
Supplement: gb-2006-7-10-r99-S2.pdf [file gb-2006-7-10-r99-S2.pdf]

**A.**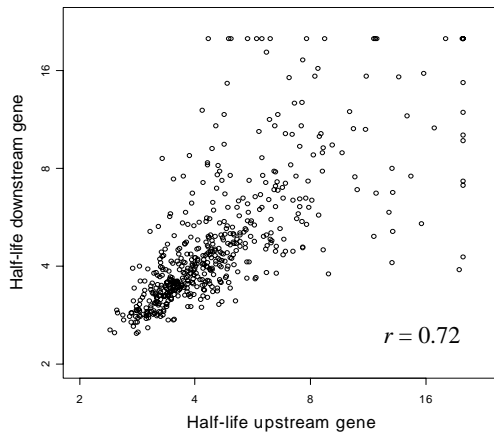**B.**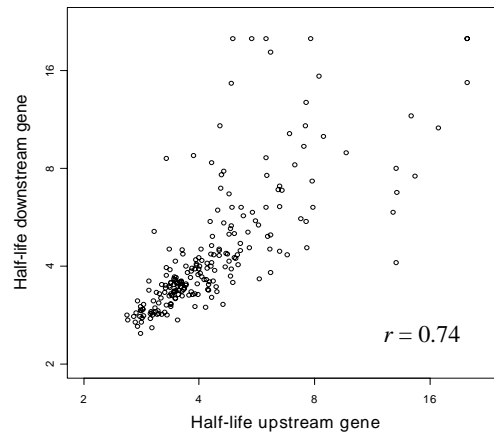

(A) Scatterplot of mRNA half-life for upstream (x-axis) vs. downstream (y-axis) gene in gene pairs encoded on the same strand and separated by <10 nt in *S. solfataricus*. (B) The subset of points in A where both genes of a pair belong to the same COG functional category, which increases the likelihood of that the genes belong to the same operon.
