# Supplementary material for: Global analysis of mRNA stability in the archaeon Sulfolobus
Source: PubMed Central journal article supplement (PMC1794556; doi:10.1186/gb-2006-7-10-r99), 2006-10-26
Supplement: gb-2006-7-10-r99-S3.pdf [file gb-2006-7-10-r99-S3.pdf]

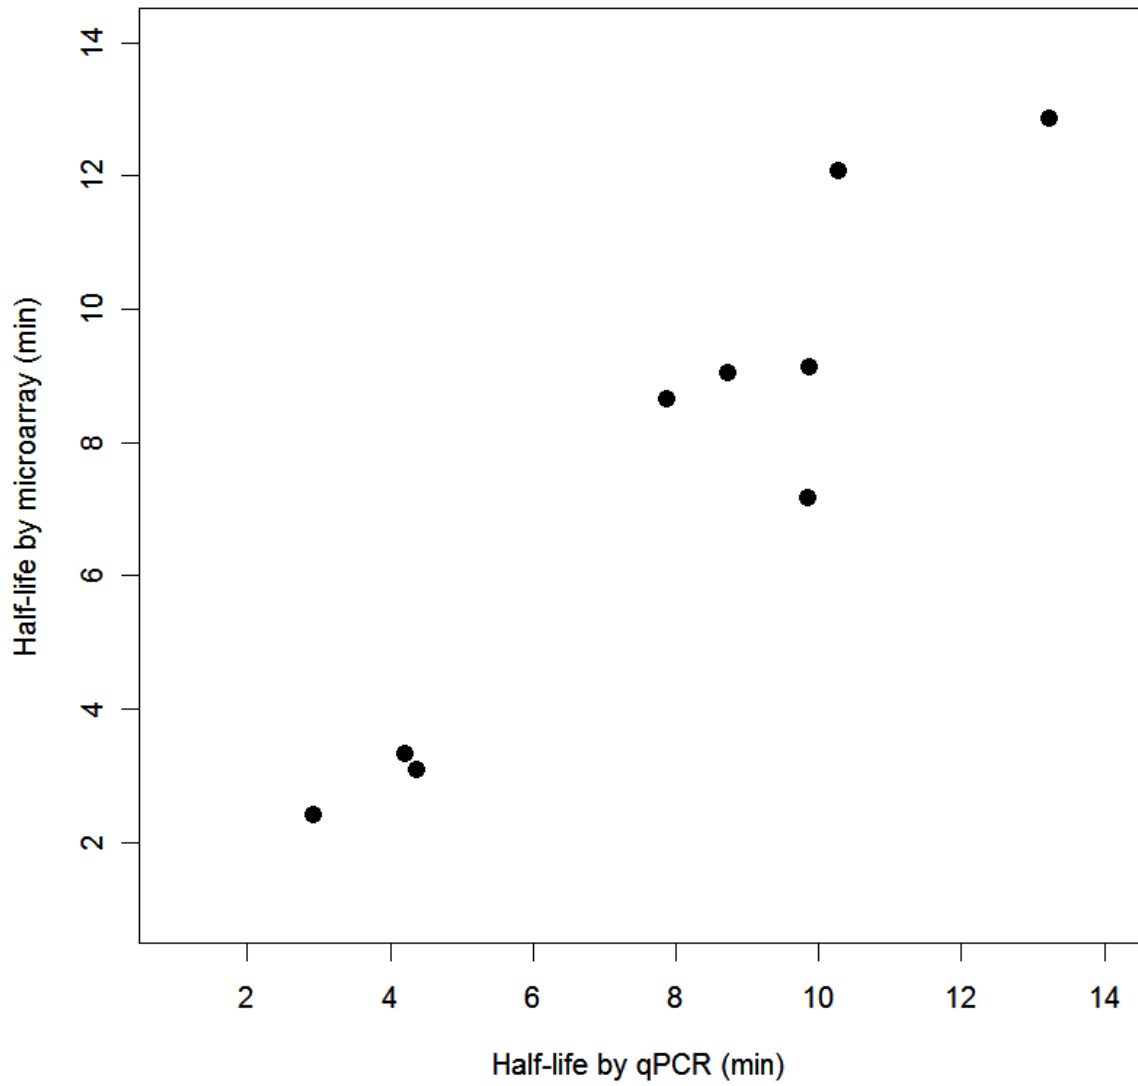

Scatterplot of mRNA half-lives for nine *S. solfataricus* genes as determined by qPCR (x-axis) and microarray (y-axis), respectively.
