# Supplementary material for: Global analysis of mRNA stability in the archaeon Sulfolobus
Source: PubMed Central journal article supplement (PMC1794556; doi:10.1186/gb-2006-7-10-r99), 2006-10-26
Supplement: gb-2006-7-10-r99-S5.pdf [file gb-2006-7-10-r99-S5.pdf]

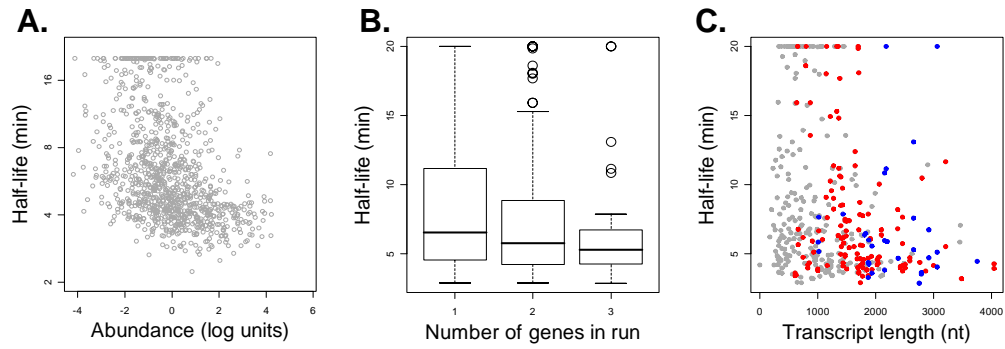

(A) Scatter plot of transcript abundance vs. half-life. (B) Box plots of half-life distributions for transcripts in one-, two- and three-gene runs. (C) Scatter plot of mRNA half-life vs. putative transcript length (counting from first start to last stop codon in each run). Genes belonging to one-, two and three-gene runs are shown in grey, red and blue, respectively.
